# Supplementary material for: Novel poly-pyridyl ruthenium complexes with bis- and tris-tetrazolate mono-dentate ligands for dye sensitized solar cells
Source: Royal Society of Chemistry journal article supplement (doi:10.1039/c4ra02032d), 2014-01-01
Supplement: c4ra02032d1.pdf [file c4ra02032d1.pdf]

# Novel Poly-pyridyl Ruthenium Complexes with Bis- and Tris-tetrazolate Mono-dentate Ligands for Dye Sensitized Solar Cells

Tharallah A. Shoker and Tarek H. Ghaddar\*

## Experimental

**Materials and Instrumentation.** All organic chemicals were purchased from Sigma-Aldrich and used as supplied. The N719 dye was purchased from Solaronix (Switzerland). FTO glass "Tec15" was purchased from Pilkington (USA). TiO<sub>2</sub> colloids were purchased from Dyesol (Australia). 4-(Diphenylamino)benzotrile,<sup>[1]</sup> (dcbpy)<sub>2</sub>RuCl<sub>2</sub><sup>[2]</sup> and (4,4',4''-trimethoxycarbonyl-2,2':6',2''-terpyridine)RuCl<sub>3</sub><sup>[3]</sup> were prepared according to reported procedures in the literature. The NMR spectra (<sup>1</sup>H and <sup>13</sup>C) were measured on a Bruker AM 300 MHz spectrometer. UV-vis spectra were recorded on a Jasco V-570 UV/vis/NIR. Steady state and lifetime emission spectra were measured on a JobinYvon Horiba Fluorolog-3 spectrofluorometer. The electrochemical setup consisted of a three-electrode cell, with a stained TiO<sub>2</sub> film on FTO with the respective dye as the working electrode, a Pt wire ~ 1 mm diameter as the counter electrode, and Ag/Ag<sup>+</sup> (10 mM AgNO<sub>3</sub>) as the reference electrode. All solution phase electrochemical measurements were done in 0.1 M tetra-butyl ammonium hexafluorophosphate (TBAPF<sub>6</sub>) in DMF, and Fc/Fc<sup>+</sup> standard (0.69 vs NHE in DMF) was used as a reference. Electrochemical impedance spectra of the DSSCs were performed with a CH Instruments 760B (USA). The obtained impedance spectra were fitted with the Z-view software (v2.8b, Scribner Associates Inc.), and the reported fitted parameters are within a 2% error. The spectra were performed at a forward bias voltage (between -0.5 and -0.8 V) in the frequency range 0.1 Hz - 10<sup>5</sup> Hz with oscillation potential amplitudes of 10 mV at RT under open circuit conditions at different light levels. The photo-anode was connected to the working electrode. The Pt based cathode was connected to the auxiliary electrode and the reference electrode. IPCE spectra were recorded using a Newport 74000 Cornerstone™ monochromator and a solar simulator illuminated by a Xenon arc lamp (Oriel) through an AM1.5 simulation filter (ScienceTech). Photocurrent vs. Voltage characteristics were measured with a Keithley 2400 sourcemeter. The irradiated area of the cell was 0.126 cm<sup>2</sup>.

**Computational Methods.** Calculations were carried out using *Gaussian 03*.<sup>[4]</sup> Geometries were optimized using the 6-31G\* basis set with (B3LYP), together with the Los Alamos effective core potential LanL2DZ<sup>[5]</sup> in water (C-PCM algorithm).<sup>[6]</sup> TD-DFT calculations were performed using the C-PCM with water as the solvent. Fifty singlet excited states were determined from the optimized structures.

**Solar Cell Fabrication.** Dye sensitized solar cells were fabricated using standard procedures. The TiO<sub>2</sub> films were made from colloidal solutions using the doctor blading method (2x times) and then heated to 480 °C for 30 mins. This afforded a 12 μm thick TiO<sub>2</sub> film, on top of which a 4 μm TiO<sub>2</sub> scattering layer (300 nm TiO<sub>2</sub> particles) was deposited and

reheated at 480 °C for 30 mins. A TiCl<sub>4</sub> post-treatment was applied to the films following reported procedures in the literature.<sup>[7]</sup> These films were then reheated at 480 °C for 30 min. The TiO<sub>2</sub> films were stained by the respective dye solution (0.3 mM) in ethanol for 18 h. The counter electrodes were fabricated by applying a 2-3 μl/cm<sup>2</sup> of 5 mM H<sub>2</sub>PtCl<sub>6</sub> in 2-propanol to the FTO glass, followed by heating in an oven at 400 °C for 20 minutes. Cells assemblies were formed by sealing the counter electrodes to the TiO<sub>2</sub> electrode with a 60 μm Surlyn (Dupont) spacer at ~ 100 °C for 3 mins. The corresponding electrolyte was introduced through two small holes, previously drilled through the counter electrode, which were then sealed with Surlyn.

#### Preparation of T133 to T136:

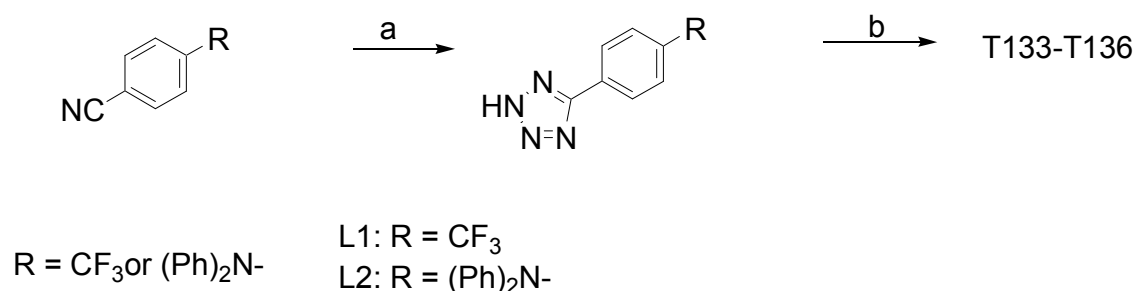

**Scheme S1:** a) NaN<sub>3</sub>, NH<sub>4</sub>Cl, 120 °C, 24 h in DMF, b) for T133-T134 (dcbpy)<sub>2</sub>RuCl<sub>2</sub> and for T135-T136 (4,4',4''-trimethoxycarbonyl-2,2':6',2''-terpyridine)RuCl<sub>3</sub>, reflux 24 h in EtOH:*N*-methylmorpholine:water 5:1:1.

**CAUTION!** *Tetrazoles are highly energetic compounds with sensitivity towards heat and impact. Although we had no problems during the synthesis, proper protective measures should be used when undertaking work involving these compounds.*

**Preparation of 5-(4-(trifluoromethyl)phenyl)-2H-tetrazole, L1:** To a solution of 4-(trifluoromethyl)benzonitrile (1.00 g, 5.85 mmol) in DMF (100 mL) was added sodium azide (1.14 g, 17.55 mmol) and ammonium chloride (0.96 g, 17.55 mmol). The reaction mixture was stirred for 24 h at 120 °C. After being cooled to room temperature, the solvent was evaporated under reduced pressure. The residue was extracted with ethyl acetate and washed with brine and dried over MgSO<sub>4</sub>, filtered and concentrated under vacuum. Purification was accomplished via silica gel column chromatography using hexane:ethyl acetate (2:1) as an eluent to afford 5-(4-(trifluoromethyl)phenyl)-2H-tetrazole as a pure white solid (0.96 g, 77 % yield). <sup>1</sup>H-NMR (300 MHz, CDCl<sub>3</sub>): δ 16.19 (*br s*), 8.26 – 8.23 (*d*, *J* = 8.1 Hz, 2H), 7.97 – 7.94 (*d*, *J* = 8.1 Hz, 2H). <sup>13</sup>C NMR (75 MHz, CDCl<sub>3</sub>) 131.54 – 130.26 (*q*, *J* = 31.87 Hz), 128.35, 127.66, 126.36 – 126.21 (*q*, *J* = 3.67 Hz), 125.56, 121.95. APPI MS (*m/z*): calculated for C<sub>8</sub>H<sub>5</sub>F<sub>3</sub>N<sub>4</sub> [M - H<sup>+</sup>]<sup>-</sup>, 213.0; found, 212.7.

**Preparation of *N,N*-diphenyl-4-(2H-tetrazol-5-yl)benzenamine, L2:** To a solution of 4-(diphenylamino)benzonitrile (1.00 g, 3.70 mmol) in DMF (100 mL) was added sodium azide (0.72 g, 11.11 mmol) and ammonium chloride (0.61 g, 11.11 mmol). The reaction mixture was stirred for 24 h at 120 °C. After being cooled to room temperature, the solvent was evaporated under reduced pressure. The

residue was extracted with water and ethyl acetate (30 ml x 3). The organic layer was washed with brine, dried over MgSO<sub>4</sub>, filtered and concentrated under vacuum. Purification was accomplished via silica gel column chromatography using hexane:ethyl acetate (2:1) as an eluent to afford *N,N*-diphenyl-4-(2H-tetrazol-5-yl)benzenamine as a pure solid (0.78 g, 68 % yield). <sup>1</sup>H NMR (300 MHz, CDCl<sub>3</sub>): δ 7.89 – 7.86 (d, *J* = 8.4 Hz, 2H), 7.34 – 7.26 (m, 4H), 7.16 – 7.09 (m, 8H). <sup>13</sup>C NMR (75 MHz, CDCl<sub>3</sub>) 150.85, 146.61, 129.61, 128.30, 125.64, 125.15, 124.38, 121.38, 115.64. APPI MS (*m/z*): calculated for C<sub>19</sub>H<sub>14</sub>N<sub>5</sub> [M - H<sup>+</sup>]<sup>-</sup>, 312.1; found, 311.9.

**General method for the preparation of the ruthenium complexes T133 and T134:** The corresponding ligand L1 or L2 (2 eq.), (dcbpy)<sub>2</sub>RuCl<sub>2</sub> (1 eq.) were refluxed overnight under N<sub>2</sub> in 5:1:1 ethanol: water: *N*-methylmorpholine. The solvent was then taken off under vacuum and the obtained dark solid was dissolved in water containing excess tetra-butyl ammonium hydroxide (TBAOH) and applied to a preparative C18-column. The compound was purified by a gradient elution with water/methanol 100%:0% to 80%:20%. Concentrating the solvent that contains the major band under reduced pressure and acidifying to pH 4.2 with 0.1 M HNO<sub>3</sub> resulted in a dark precipitate. The solid was filtered to yield a dark solid, which was dried under vacuum at 60 °C for 24 h. This afforded the two dyes with one TBA<sup>+</sup> as a counter cation with quantitative yields.

**T133.TBA:** <sup>1</sup>H NMR (300 MHz, MeOD): δ 10.07 – 10.05 (d, *J* = 5.7 Hz, 2H), 8.94 (s, 2H), 8.82 (s, 2H), 8.16 – 8.13 (d, *J* = 6.1 Hz, 2H), 8.07 – 8.05 (d, *J* = 6.1 Hz, 2H), 7.74 – 7.64 (m, 6H), 7.3 – 7.24 (m, 8H), 7.06 – 6.95 (m, 16H), 3.22 – 3.16 (m, 8H), 1.67 – 1.56 (m, 8H), 1.43 – 1.28 (m, 8H), 1.00 – 0.95 (t, *J* = 7.2 Hz, 12H). APPI MS (*m/z*): calculated for C<sub>78</sub>H<sub>79</sub>N<sub>15</sub>O<sub>8</sub>Ru [M - H<sup>+</sup>]<sup>-</sup>, 1454.5; found, 1453.7.

**T134.TBA:** <sup>1</sup>H NMR (300 MHz, MeOD): δ 9.88 – 9.86 (d, *J* = 5.7 Hz, 2H), 8.91 (d, *J* = 1.2 Hz, 2H), 8.79 (d, *J* = 1.2 Hz, 2H), 8.12 – 8.10 (dd, *J*<sub>1</sub> = 5.7 Hz, *J*<sub>2</sub> = 1.5 Hz, 2H), 8.01 – 7.95 (m, 6H), 7.64 – 7.60 (m, 6H), 3.24 – 3.18 (m, 8H), 1.69 – 1.58 (m, 8H), 1.45 – 1.33 (m, 8H), 1.02 – 0.97 (t, *J* = 7.2 Hz, 12H). APPI MS (*m/z*): calculated for C<sub>56</sub>H<sub>59</sub>F<sub>6</sub>N<sub>13</sub>O<sub>8</sub>Ru [M - H<sup>+</sup>]<sup>-</sup>, 1256.2; found, 1256.1.

**General method for the preparation of the ruthenium complexes T135 and T136:** The corresponding ligand L1 or L2 (6 eq., excess), (4,4',4''-trimethoxycarbonyl-2,2':6',2''-terpyridine)RuCl<sub>3</sub> (1 eq.) were refluxed overnight under N<sub>2</sub> in 5:1:1 ethanol: water: *N*-methylmorpholine. The solvent was then taken off under vacuum and the obtained dark solid was dissolved in water containing excess tetra-butyl ammonium hydroxide (TBAOH), refluxed for 2 hr and then applied to a preparative C18-column. The compound was purified by a gradient elution with water/methanol 100%:0% to 80%:20%. Concentrating the solvent that contains the major band under reduced pressure and acidifying to pH 4.2 with 0.1 M HNO<sub>3</sub> resulted in a dark precipitate. The solid was filtered to yield a dark solid, which was dried under vacuum at 60 °C for 24 h. This afforded the two dyes with two TBA<sup>+</sup> as counter cations with quantitative yields.

**T135.2TBA:** <sup>1</sup>H NMR (300 MHz, MeOD) δ 10.34 – 10.32 (d, *J* = 5.7 Hz, 2H), 8.90 (s, 4H), 8.45 – 8.42 (d, *J* = 8.1 Hz, 2H), 8.18 – 8.15 (d, *J* = 5.7 Hz, 2H), 7.82 – 7.79 (d, *J* = 8.1 Hz, 2H), 7.76 – 7.73 (d, *J* = 8.1 Hz, 4H), 7.54 – 7.51 (d, *J* = 8.1 Hz, 4H), 3.21 – 3.15 (m, 16H), 1.61 – 1.56 (m, 16H), 1.38 – 1.31 (m, 16H), 1.01 – 0.97 (t, *J* = 7.2 Hz, 24H). APPI MS (*m/z*): calculated for C<sub>74</sub>H<sub>94</sub>F<sub>9</sub>N<sub>17</sub>O<sub>6</sub>Ru [M - H<sup>+</sup>]<sup>-</sup>, 1588.7; found, 1587.4.

**T136.2TBA:** <sup>1</sup>H NMR (300 MHz, MeOD) δ 9.95 – 9.93 (d, *J* = 5.7 Hz, 2H), 8.79 – 8.77 (m, 4H), 8.08 – 8.01 (m, 4H), 7.40 – 7.37 (d, *J* = 8.7 Hz, 4H), 7.31 – 7.18 (m, 9H), 7.10 – 6.92 (m, 14H), 6.81 – 6.78 (d, *J*

= 8.7 Hz, 4H), 3.21 – 3.15 (m, 16H), 1.61 – 1.56 (m, 16H), 1.38 – 1.31 (m, 16H), 1.01 – 0.97 (t,  $J = 7.2$  Hz, 24H). APPI MS ( $m/z$ ): calculated for  $C_{107}H_{124}N_{20}O_6Ru$  [ $M - H^+$ ] $^-$ , 1886.3; found, 1886.4.

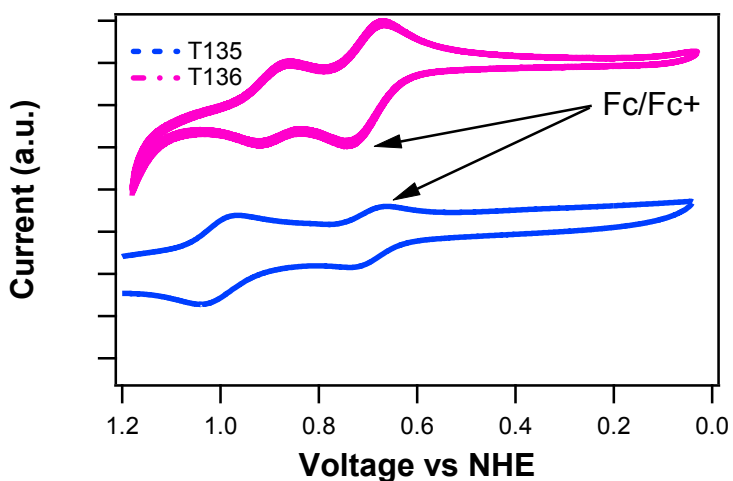

Figure S1: Cyclic voltammograms (0.1 M  $Bu_4NPF_6$ , DMF) scan for T135 and T136.

**Table S1:** Calculated Spectroscopic Data for T133 to T136

| Dye  | TDDFT excitation energies, nm | Oscillator Strength <sup>a</sup> | Assignment                                                                                      |
|------|-------------------------------|----------------------------------|-------------------------------------------------------------------------------------------------|
| T133 | 694.6                         | 0.0191                           | HOMO - -> LUMO(79%) HOMO-2 - -> LUMO(18%)                                                       |
|      | 644.4                         | 0.0122                           | HOMO-1 - -> LUMO(80%) HOMO - -> LUMO+1(11%)<br>HOMO-2 - -> LUMO+1(5%)                           |
|      | 613.9                         | 0.0123                           | HOMO-1 - -> LUMO+1(92%)                                                                         |
|      | 481.7                         | 0.1784                           | HOMO-4 - -> LUMO(40%) HOMO-1 - -> LUMO+2(27%)<br>HOMO-1 - -> LUMO+3(13%) HOMO-3 - -> LUMO+1(8%) |
|      | 481.0                         | 0.1044                           | HOMO-1 - -> LUMO+2(36%) HOMO-4 - -> LUMO(30%)<br>HOMO-1 - -> LUMO+3(12%) HOMO - -> LUMO+2(11%)  |
| T134 | 624.0                         | 0.0254                           | HOMO - -> LUMO(97%)                                                                             |
|      | 608.1                         | 0.0138                           | HOMO - -> LUMO+1(94%)                                                                           |
|      | 533.6                         | 0.0119                           | HOMO-1 - -> LUMO+1(56%) HOMO-1 - -> LUMO(31%)<br>HOMO-2 - -> LUMO(7%)                           |
|      | 481.8                         | 0.1548                           | HOMO-2 - -> LUMO(82%) HOMO-1 - -> LUMO+1(9%)<br>HOMO - -> LUMO+2(7%)                            |
|      | 443.6                         | 0.1525                           | HOMO - -> LUMO+2(91%) HOMO-2 - -> LUMO(5%)                                                      |

|      |       |        |                                                                                             |
|------|-------|--------|---------------------------------------------------------------------------------------------|
| T135 | 662.1 | 0.0368 | HOMO --> LUMO(74%) HOMO-1 --> LUMO(19%)                                                     |
|      | 572.8 | 0.0546 | HOMO-1 --> LUMO(70%) HOMO --> LUMO(12%)<br>HOMO --> LUMO+1(7%) HOMO-1 --> LUMO+1(6%)        |
|      | 542.6 | 0.0516 | HOMO --> LUMO+1(85%) HOMO --> LUMO(6%)                                                      |
|      | 442.7 | 0.1323 | HOMO --> LUMO+2(43%) HOMO --> LUMO+3(30%)<br>HOMO-1 --> LUMO+1(19%)                         |
| T136 | 712.3 | 0.0311 | HOMO --> LUMO(75%) HOMO-3 --> LUMO(13%)<br>HOMO-4 --> LUMO(7%)                              |
|      | 630.3 | 0.0369 | HOMO-1 --> LUMO(86%) HOMO-4 --> LUMO(6%)                                                    |
|      | 586.8 | 0.0519 | HOMO --> LUMO+1(54%) HOMO-4 --> LUMO(28%)<br>HOMO-3 --> LUMO+1(11%)                         |
|      | 555.0 | 0.0205 | HOMO-3 --> LUMO(55%) HOMO-4 --> LUMO(19%)<br>HOMO-4 --> LUMO+1(10%) HOMO --> LUMO+1(6%)     |
|      | 494.5 | 0.0272 | HOMO --> LUMO+2(79%) HOMO-3 --> LUMO+2(9%)<br>HOMO-4 --> LUMO+1(8%)                         |
|      | 488.9 | 0.0128 | HOMO-3 --> LUMO+1(56%) HOMO-5 --><br>LUMO+1(24%) HOMO --> LUMO+1(14%)                       |
|      | 466.5 | 0.0138 | HOMO --> LUMO+3(66%) HOMO-3 --> LUMO+3(12%)<br>HOMO-4 --> LUMO+1(12%) HOMO-2 --> LUMO+2(5%) |

---

<sup>a</sup> Only bands with oscillator strength  $f \geq 0.01$  are listed

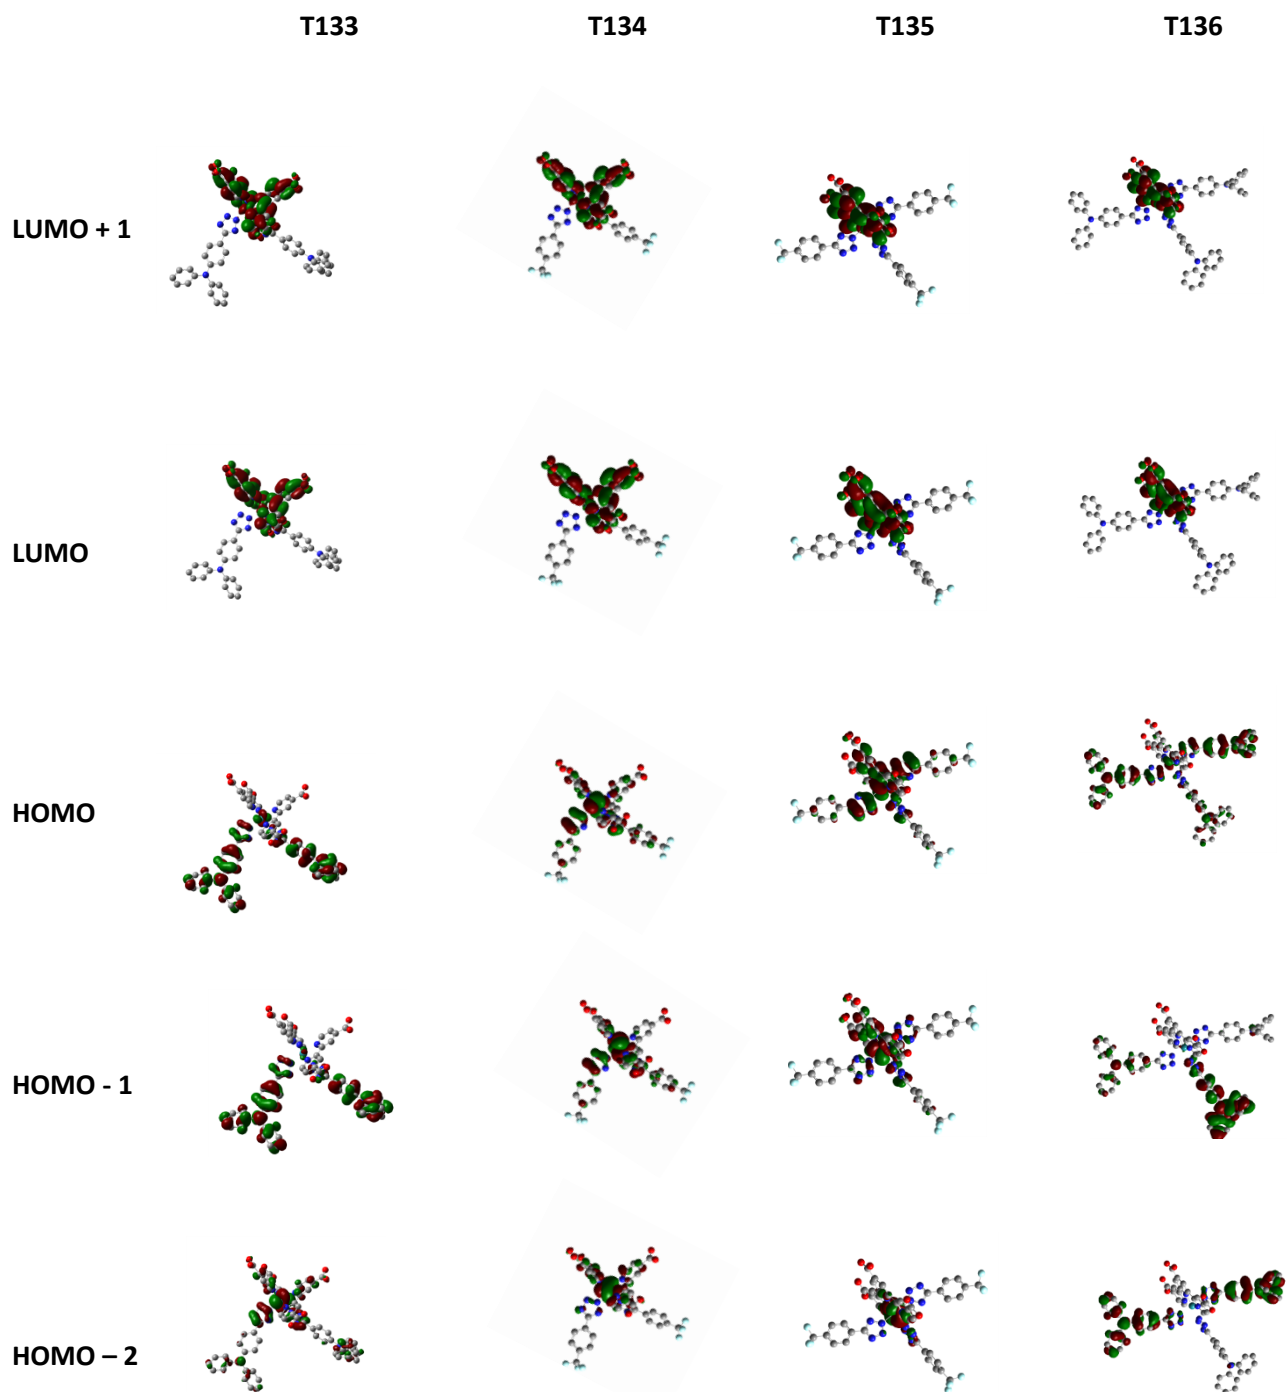

**Figure S2:** The isodensity plots for the HOMO-2, HOMO-1, HOMO, LUMO and LUMO+1 of T133 to T136.

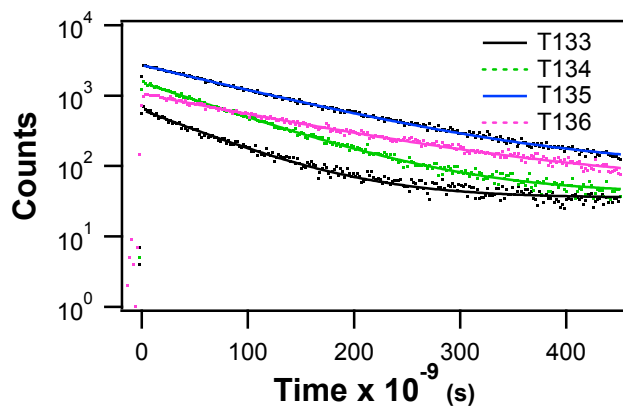

**Figure S3:** Lifetime emission measurements of T133 to T136 in aerated ethanol with an excitation wavelength  $\lambda_{\text{ex}} = 532 \text{ nm}$ .

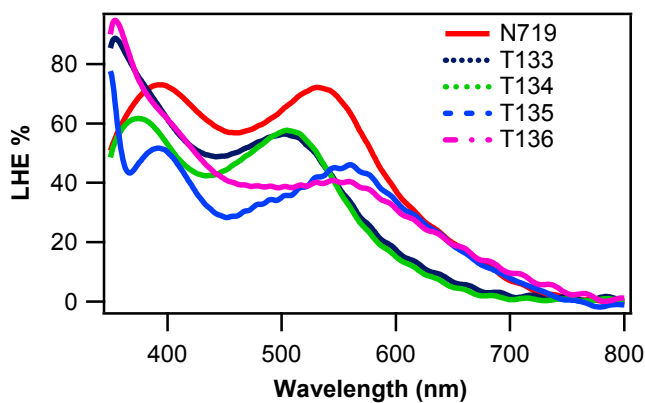

**Figure S4:** Light harvesting efficiency of T133 to T136 on  $6 \mu\text{m}$   $\text{TiO}_2$  film.

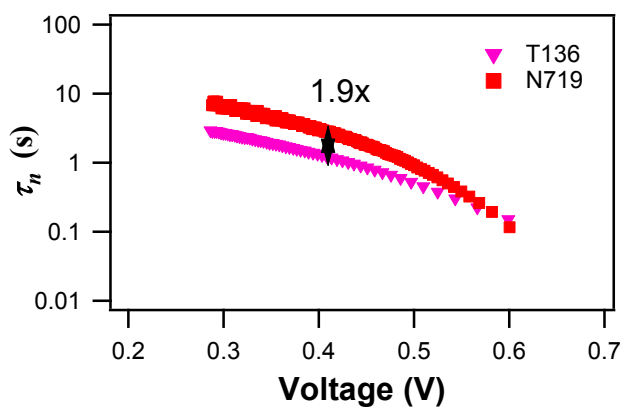

**Figure S5:** Electron lifetimes obtained from OCVD of N719 (square-red) and T136 (triangle-violet) assembled cells with EL2 as the corresponding electrolyte.

References:

- [1] G. Wang, Y. He, *Mat. Lett.* **2009**, *63*, 470.
- [2] M. K. Nazeeruddin, M. Grätzel, *Inorg. Syn.* **2002**, *33*, 185.
- [3] M. K. Nazeeruddin, P. Péchy, T. Renouard, S. M. Zakeeruddin, R. Humphry-Baker, P. Cointe, P. Liska, L. Cevey, E. Costa, V. Shklover, L. Spiccia, G. B. Deacon, C. A. Bignozzi, M. Grätzel, *J. Am. Chem. Soc.* **2001**, *123*, 1613.
- [4] M. J. Frisch, e. al., *Gaussian 03; Gaussian, Inc.: Pittsburgh, PA, 2003.*
- [5] P. J. Hay, W. R. Wadt, *J. Phys. Chem.* **1985**, *82*, 270.
- [6] M. Cossi, V. Barone, *J. Chem. Phys.* **2001**, *115*, 4708.
- [7] B. C. O'Regan, J. R. Durrant, P. M. Sommeling, N. J. Bakker, *J. Phys. Chem. C* **2007**, *111*, 14001.
